# Supplementary material
Source: MDPI journal article supplement (https://www.mdpi.com/1996-1073/11/1/150)
Supplement: s1 [file s1]

Supplementary Information

1. Introduction

This document is organized in three sections. First, we present a description of the geometric properties of the battery cell manufactured at the Battery LabFactory Braunschweig for this study. The second section presents a summary of the material composition for the battery disassembled within the context of the LithoRec project [1–6]. The third section presents the life inventory that is used to estimate the life cycle impact assessment of the battery cells being compared.

2. Geometric Characteristics of the Cell Considered

The cell manufactured is described in Figure S1. The width of the electrodes is 205 mm for the cathode (Wcat) and 210 mm for the anode (Wano). The length was measured to be 295 mm for the cathode (Lcathode) and 300 mm for the anode (Lano). The thickness of the cell was set to 20 mm (dcell) excluding the pouch foil required to package the cell. For the calculated cell volume, a number of 138 stacks (nstacks) for the LIB system and 68 stacks for the LSB were estimated. This was calculated by dividing the cell thickness by the stack thickness. The thickness of the pouch foil is 0.115 mm and its weight pro cell is 0.028 kg. This value was estimated considering the density of its materials (polyamide, aluminum and polypropylene) and also measured at the Battery LabFactory Braunschweig.


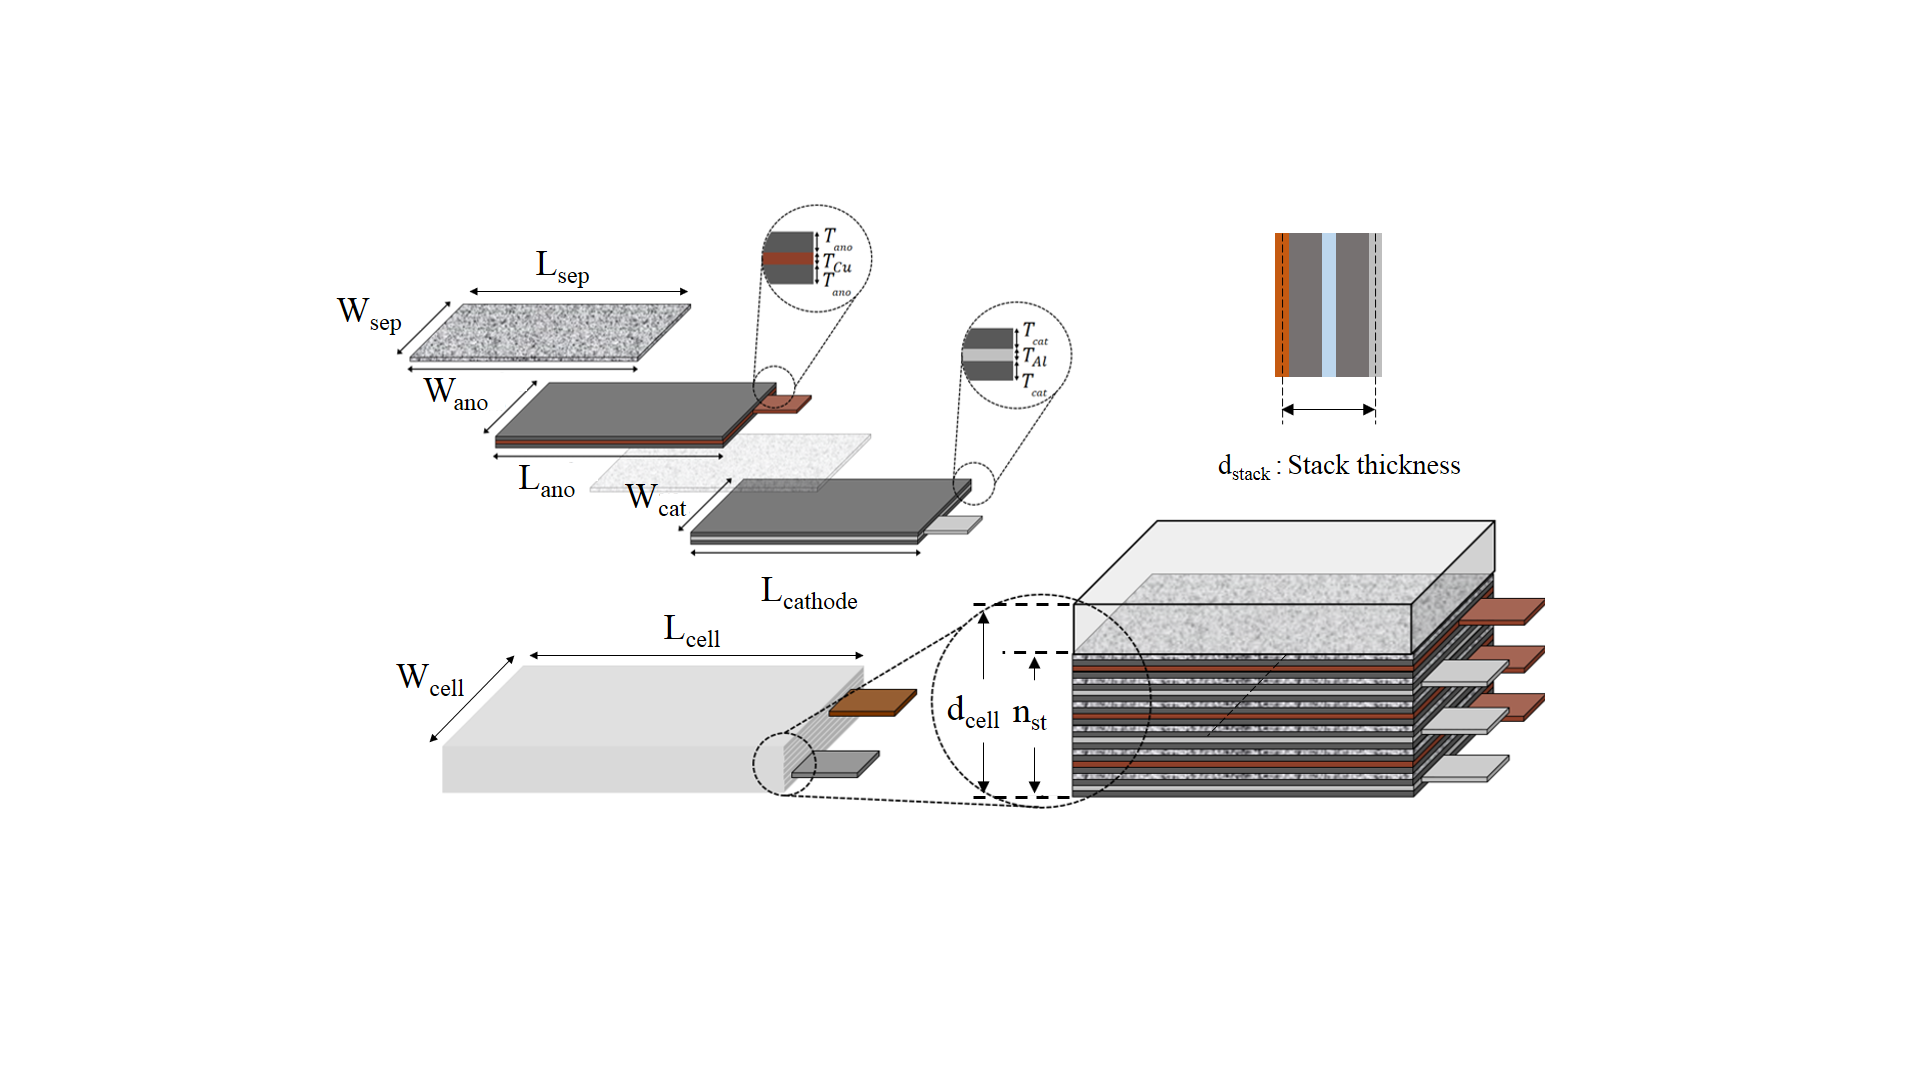


**Figure S1.** Parameters to estimate mass and volume of a battery cell.

3. Mass distribution of the disassembled battery pack system

Table S1 presents a summary of the distribution of mass for the different components and their materials for the battery pack disassembled within the LithoRec project [1]–[4].

**Table S1.** Summary of the material composition of the disassembled battery systems.

| **Component** | **Parts** | **Material** | **Share (%)** |
| --- | --- | --- | --- |
| Power electronics, BMS and power transmission | BMS/electronics | electronic components | 1.15 |
| Cable harness | copper | 0.21 |
|  | polypropylene | 0.05 |
|  | PBT GF 20 | 0.04 |
| Bus bars (conductor rail) | copper | 1.03 |
|  | polypropylene | 0.08 |
|  | Aluminum | 0.14 |
| Charging tray | copper | 0.49 |
|  | polypropylene | 0.05 |
| Constructive elements | Lid | PBT GF 20 | 4.37 |
| Base plate | Steel | 26.2 |
| Cover connection | polypropylene | 0.01 |
| Cover power electronics | PA6 GF30 (nylon reinforced glass fiber) | 0.05 |
| Cover other | polypropylene | 0.04 |
| Frame | Steel | 0.88 |
| Holders | Steel | 1.39 |
| Bridge elements | Steel | 0.15 |
| Plastic holders | polypropylene | 0.03 |
| Module bridge elements | Steel | 0.02 |
| Cooling elements (heat sinks) | Aluminum | 0.61 |
| Cells |  |  | 63.0 |

4. Life Cycle Inventory

In this section we present the inventory of the two battery systems modelled. The inventory is presented in four sections. The first section presents the data used for the modelling of the electronic components as wells as the electric transmission devices. The second section presents the data used to model the housing and other constructive elements of the battery system. The third and fourth sections present the data used to model the active material of the LIB and LSB systems respectively.

**Table S2.1** Inventory composition of BMS and cables.

| **Description** | **Input** | **Output** | **Unit** | **Source** |
| --- | --- | --- | --- | --- |
| Functional Unit |  |  |  |  |
| Power electronics, BMS |  | 1.0 × 100 | kg |  |
| Components |  |  |  |  |
| BMS/Electronics | 3.54 × 10‒1 |  | kg | disassembled battery system (Lithorec project) |
| Cables | 9.36 × 10‒2 |  | kg | disassembled battery system (Lithorec project) |
| Bus bar (conductor rail) | 3.85 × 10‒1 |  | kg | disassembled battery system (Lithorec project) |
| charging tray | 1.68 × 10‒1 |  | kg | disassembled battery system (Lithorec project) |

1. Inventory: BMS, power electronics and electricity transmission

**Table S2.2.** Inventory electronic components.

| **Description** | **Input** | **Output** | **Unit** | **Source** |
| --- | --- | --- | --- | --- |
| **Functional Unit** |  |  |  |  |
| Power electronics, BMS |  | 1.0 × 100 | kg |  |
| **Components** |  |  |  |  |
| Electronic component | 1.0 × 100 |  | kg | *Ecoinvent* - printed wiring board production, through-hole mounted, unsp. Pb free (GLO) |

**Table S2.3.** Inventory Cables.

| **Description** | **Input** | **Output** | **Unit** | **Source** |
| --- | --- | --- | --- | --- |
| **Functional Unit** |  |  |  |  |
| Cable harness |  | 1.0 × 100 | kg |  |
| **Materials** |  |  |  |  |
| polypropylene | 1.77 × 10‒1 |  | kg | *Ecoinvent* - glass fibre reinforced plastic production, polyamide, injection moulded (RER) |
| PBT GF20 | 1.43 × 10‒1 |  | kg | *Ecoinvent* - polybutadiene production (RER) |
| Primary copper (65%) | 5.78 × 10‒1 |  | kg | *Ecoinvent* - copper primary, at refinery (GLO) |
| Secondary copper (35%) | 1.02 × 10‒1 |  | kg | *Ecoinvent* - copper secondary, at refinery (RER) |
| **Processes** |  |  |  |  |
| Plastic moulding | 3.20 × 10‒1 |  | kg | *Ecoinvent* - injection moulding (RER) |
| Copper working | 6.80 × 10‒1 |  | kg | Ecoinvent - metal working, average for copper product manufacturing (RER) |

**Table S2.4.** Inventory Bus bar.

| **Description** | **Input** | **Output** | **Unit** | **Source** |
| --- | --- | --- | --- | --- |
| **Functional Unit** |  |  |  |  |
| Bus bar (conductor rail) |  | 1.0 × 100 | kg |  |
| **Materials** |  |  |  |  |
| Primary copper (85%) | 7.02 × 10‒1 |  | kg | *Ecoinvent* - copper primary, at refinery (GLO) |
| Secondary copper (15%) | 1.20 × 10‒1 |  | kg | *Ecoinvent* - copper secondary, at refinery (RER) |
| polypropylene | 6.00 × 10‒2 |  | kg | *Ecoinvent* - polypropylene production, granulate (RER) |
| Aluminum | 1.18 × 10‒1 |  | kg | *Ecoinvent* - aluminum production mix, at plant (RER) |
| **Processes** |  |  |  |  |
| Copper working | 8.26 × 10‒1 |  | kg | *Ecoinvent* - metal working, average for copper product manufacturing (RER) |
| Plastic molding | 7.30 × 10‒2 |  | kg | *Ecoinvent* - injection molding (RER) |
| Aluminum working | 1.02 × 10‒1 |  | kg | *Ecoinvent* - metal working, average for aluminum product manufacturing (RER) |

**Table S2.5.** Inventory Charging tray.

| **Description** | **Input** | **Output** | **Unit** | **Source** |
| --- | --- | --- | --- | --- |
| **Functional Unit** |  |  |  |  |
| charging tray |  | 1.0 × 100 | kg |  |
| **Materials** |  |  |  |  |
| Primary copper (85%) | 7.65 × 10‒1 |  | kg | *Ecoinvent* - copper primary, at refinery (GLO) |
| Secondary copper (15%) | 1.35 × 10‒1 |  | kg | *Ecoinvent* - copper secondary, at refinery (RER) |
| polypropylene | 1.00 × 10‒1 |  | kg | *Ecoinvent* - polypropylene production, granulate (RER) |
| **Processes** |  |  |  |  |
| Copper working | 9.00 × 10‒1 |  | kg | *Ecoinvent* - metal working, average for copper product manufacturing (RER) |
| Plastic moulding | 1.00 × 10‒1 |  | kg | Ecoinvent - injection moulding (RER) |

1. Inventory for the battery housing and the constructive elements

**Table S3.1.** Inventory for the housing and constructive elements.

| **Description** | **Input** | **Output** | **Unit** | **Source** |
| --- | --- | --- | --- | --- |
| **Functional Unit** |  |  |  |  |
| Constructive Elements |  | 1.0 × 100 | kg |  |
| **Components** |  |  |  |  |
| Lid | 1.29 × 10‒1 |  | kg | disassembled battery system (LithoRec project) |
| Base plate | 7.76 × 10‒1 |  | kg | disassembled battery system (LithoRec project) |
| Cover connection | 4.00 × 10‒4 |  | kg | disassembled battery system (LithoRec project) |
| Cover power electronics | 1.50 × 10‒3 |  | kg | disassembled battery system (LithoRec project) |
| Cover other | 1.10 × 10‒3 |  | kg | disassembled battery system (LithoRec project) |
| Frame, holder and bridge elements | 7.18 × 10‒2 |  | kg | disassembled battery system (LithoRec project) |
| Cooling elements | 1.80 × 10‒2 |  | kg | disassembled battery system (LithoRec project) |

**Table S3.2.** Inventory for the battery’s Lid.

| **Description** | **Input** | **Output** | **Unit** | **Source** |
| --- | --- | --- | --- | --- |
| **Functional Unit** |  |  |  |  |
| Lid |  | 1.0 × 100 | kg |  |
| **Materials** |  |  |  |  |
| Glass fibre reinforced plastic | 1.00 × 100 |  | kg | *Ecoinvent* - glass fibre reinforced plastic production, polyamide, injection moulded (RER) |
| **Processes** |  |  |  |  |
| Plastic moulding | 1.00 × 100 |  | kg | *Ecoinvent* - injection moulding (RER) |

**Table S3.3.** Inventory for the base plate.

| **Description** | **Input** | **Output** | **Unit** | **Source** |
| --- | --- | --- | --- | --- |
| **Functional Unit** |  |  |  |  |
| Base plate |  | 1.0 × 100 | kg |  |
| **Materials** |  |  |  |  |
| Steel | 1.00 × 100 |  | kg | *Ecoinvent* - steel production, converter, low-alloyed |
| **Processes** |  |  | kg |  |
| Steel working | 1.00 × 100 |  | kg | *Ecoinvent* - metal working, average for steel product manufacturing (RER) |

**Table S3.4.** Inventory for the cover connections.

| **Description** | **Input** | **Output** | **Unit** | **Source** |
| --- | --- | --- | --- | --- |
| **Functional Unit** |  |  |  |  |
| Cover connection |  | 1.0 × 100 | kg |  |
| **Materials** |  |  |  |  |
| polypropylene | 1.00 × 100 |  | kg | *Ecoinvent* - polypropylene production, granulate (RER) |
| **Processes** |  |  |  |  |
| Plastic molding | 1.00 × 100 |  | kg | *Ecoinvent* - injection molding (RER) |

**Table S3.5.** Inventory for the cover of the power electronics.

| **Description** | **Input** | **Output** | **Unit** | **Source** |
| --- | --- | --- | --- | --- |
| **Functional Unit** |  |  |  |  |
| Cover power electronics |  | 1.0 × 100 | kg |  |
| **Materials** |  |  |  |  |
| PA6 GF30 | 1.00 × 100 |  | kg | *Ecoinvent* - glass fibre reinforced plastic production, polyamide, injection moulded (RER) |
| **Processes** |  |  | kg |  |
| Plastic moulding | 1.00 × 100 |  | kg | *Ecoinvent* - injection moulding (RER) |

**Table S3.6.** Inventory for the cover of other elements.

| **Description** | **Input** | **Output** | **Unit** | **Source** |
| --- | --- | --- | --- | --- |
| **Functional Unit** |  |  |  |  |
| Cover others |  | 1.0 × 100 | kg |  |
| **Materials** |  |  |  |  |
| polypropylene | 1.00 × 100 |  | kg | *Ecoinvent* - polypropylene production, granulate (RER) |
| **Processes** |  |  |  |  |
| Plastic moulding | 1.00 × 100 |  | kg | *Ecoinvent* - injection moulding (RER) |

**Table S3.7.** Inventory for the battery’s frame.

| **Description** | **Input** | **Output** | **Unit** | **Source** |
| --- | --- | --- | --- | --- |
| **Functional Unit** |  |  |  |  |
| Frame |  | 1.0 × 100 | kg |  |
| **Materials** |  |  |  |  |
| Steel | 1.00 × 100 |  | kg | Ecoinvent - steel production, converter, low-alloyed |
| **Processes** |  |  | kg |  |
| Steel working | 1.00 × 100 |  | kg | Ecoinvent - metal working, average for steel product manufacturing (RER) |

**Table S3.8.** Inventory for the cooling elements (heat sinks).

| **Description** | **Input** | **Output** | **Unit** | **Source** |
| --- | --- | --- | --- | --- |
| **Functional Unit** |  |  |  |  |
| Cooling elements |  | 1.0 × 100 | kg |  |
| **Materials** |  |  |  |  |
| Aluminium | 1.00 × 100 |  | kg | *Ecoinvent* - aluminium production mix, at plant (RER) |
| **Processes** |  |  | kg |  |
| Aluminium working | 1.00 × 100 |  | kg | *Ecoinvent* - metal working, average for aluminium product manufacturing (RER) |

**Table S3.9.** Inventory for the holders.

| **Description** | **Input** | **Output** | **Unit** | **Source** |
| --- | --- | --- | --- | --- |
| **Functional Unit** |  |  |  |  |
| Holder |  | 1.0 × 100 | kg |  |
| **Materials** |  |  |  |  |
| Steel | 1.00 × 100 |  | kg | *Ecoinvent* - steel production, converter, low-alloyed |
| **Processes** |  |  | kg |  |
| Steel working | 1.00 × 100 |  | kg | *Ecoinvent* - metal working, average for steel product manufacturing (RER) |

1. Inventory for the production of the LIB battery cells

The mass distribution of the different components in the LIB cell are shown in Table S4.1. We used the inventory provided by Ellingsen and colleagues [7] to model the production of aluminum foil, separator, electrolyte, anode (graphite), copper foil and pouch foil. The production of Ni1/3Co1/3Mn1/3 was modelled using the inventory provided by *Majeau-Bettez* and colleagues [8]. Infrastructure such as factories or machinery was not considered.

**Table S4.1.** Inventory for the production of the LIB battery cell at the BLB.

| **Description** | **Input** | **Output** | **Unit** | **Source** |
| --- | --- | --- | --- | --- |
| **Functional Unit** |  |  |  |  |
| Battery Cell LIB |  | 1.00 × 100 | kg |  |
| **Components** |  |  |  |  |
| Aluminum foil | 7.00 × 10‒2 |  | kg | Battery LabFactory Braunschweig (BLB) |
| Cathode slurry LIB | 4.00 × 10‒1 |  | kg | Battery LabFactory Braunschweig (BLB) |
| Separator | 5.00 × 10‒2 |  | kg | Battery LabFactory Braunschweig (BLB) |
| Electrolyte | 1.30 × 10‒1 |  | kg | Battery LabFactory Braunschweig (BLB) |
| Anode LIB | 2.20 × 10‒1 |  | kg | Battery LabFactory Braunschweig (BLB) |
| Copper foil | 1.20 × 10‒1 |  | kg | Battery LabFactory Braunschweig (BLB) |
| Pouch foil | 2.00 × 10‒2 |  | kg | Battery LabFactory Braunschweig (BLB) |

**Table S4.2.** Inventory for the production of positive electrode paste.

| **Description** | **Input** | **Output** | **Unit** | **Source** |
| --- | --- | --- | --- | --- |
| **Functional Unit** |  |  |  |  |
| Positive electrode paste |  | 1.00 × 100 | kg |  |
| **Components** |  |  |  |  |
| N-methyl-2-pyrrolidone | 8.20 × 10‒1 | 8.20 × 10‒1 | kg | Ecoinvent - market for N-methyl-2-pyrrolidone (GLO) |
| Carbon Black | 2.00 × 10‒2 |  | kg | Ecoinvent - market for carbon black (GLO) |
| Polyvinylfluoride | 2.00 × 10‒2 |  | kg | *Ecoinvent* - market for polyvinylfluoride (GLO) |
| Ni1/3Co1/3Mn1/3 | 9.60 × 10‒1 |  | kg | Majeau-Bettez and colleagues 2011 |

**Table S4.3.** Inventory for the production of anode slurry.

| **Description** | **Input** | **Output** | **Unit** | **Source** |
| --- | --- | --- | --- | --- |
| Functional Unit |  |  |  |  |
| Anode graphite paste |  | 1.00 × 100 | kg |  |
| Components |  |  |  |  |
| Water | 1.00 × 100 | 1.00 × 100 | kg | *Ecoinvent* - market for water, deionised, from tap water, at user (RoW) |
| Carbon Black | 3.00 × 10‒2 |  | kg | *Ecoinvent* - carbon black production (GLO) |
| Graphite | 9.40 × 10‒1 |  | kg | Ellingsen and colleagues [7] |
| Polyvinylfluoride | 4.00 × 10‒2 |  | kg | *Ecoinvent* - polyvinylfluoride production (US) |

1. Inventory for the production of the LSB battery cells

The mass distribution of the different components in the LSB cell are shown in Table S5.1. We used the inventory provided by Ellingsen and colleagues [7] to model the production of aluminum foil, separator, electrolyte, copper foil and pouch foil. The production of sulfur was modelled using the inventory provided in Table S5.2. The production of the lithium foil was modelled using the inventory provided in the Table S5.3. Infrastructure such as factories or machinery was not considered.

**Table S5.1.** Inventory for the production of the LIS battery cell.

| **Description** | **Input** | **Output** | **Unit** | **Source** |
| --- | --- | --- | --- | --- |
| Functional Unit |  |  |  |  |
| Battery Cell LIB |  | 1.00 × 100 | kg |  |
| Components |  |  |  |  |
| Aluminum foil | 1.10 × 10‒1 |  | kg | Battery LabFactory Braunschweig (BLB) |
| Sulfur | 1.90 × 10‒1 |  | kg | Battery LabFactory Braunschweig (BLB) |
| Separator | 8.00 × 10‒2 |  | kg | Battery LabFactory Braunschweig (BLB) |
| Electrolyte | 2.80 × 10‒1 |  | kg | Battery LabFactory Braunschweig (BLB) |
| Lithium foil | 1.20 × 10‒1 |  | kg | Battery LabFactory Braunschweig (BLB) |
| Copper foil | 2.00 × 10‒1 |  | kg | Battery LabFactory Braunschweig (BLB) |
| Pouch foil | 3.00 × 10‒2 |  | kg | Battery LabFactory Braunschweig (BLB) |

**Table S5.2.** Inventory for the production of sulfur slurry.

| **Description** | **Input** | **Output** | **Unit** | **Source** |
| --- | --- | --- | --- | --- |
| Functional Unit |  |  |  |  |
| S8 |  | 1.00 × 100 | kg |  |
| Components |  |  |  |  |
| N-methyl-2-pyrrolidone | 4.00 × 100 | 4.00 × 100 | kg | *Ecoinvent* - market for N-methyl-2-pyrrolidone (GLO) |
| Carbon black | 3.00 × 10‒1 |  | kg | *Ecoinvent* - market for carbon black (GLO) |
| Polyvinyl fluoride | 1.00 × 10‒1 |  | kg | *Ecoinvent* - market for polyvinylfluoride (GLO) |
| Sulphur | 6.00 × 10‒1 |  | kg | *Ecoinvent* - market for sulfur (GLO) |

**Table S5.4.** Inventory for the production of lithium foil.

| **Description** | **Input** | **Output** | **Unit** | **Source** |
| --- | --- | --- | --- | --- |
| Functional Unit |  |  |  |  |
| Lithium Foil |  | 1.00 × 100 | kg |  |
| Components |  |  |  |  |
| Lithium | 1.00 × 100 |  | kg | *Ecoinvent* - electrolysis of lithium chloride (GLO) |
| Processes |  |  |  |  |
| Sheet rolling | 1.00 × 100 |  | kg | *Ecoinvent* - sheet rolling, copper (RER) |
| electricity | 6.85 × 10‒1 |  | MJ | CES Selector |
| Transport, rail | 1.85 × 10‒2 |  | metric | *Ecoinvent* - transport, freight train (DE) |
| Transport, ship | 1.86 × 10‒4 |  | metric | *Ecoinvent* - transport, freight sea, transoceanic ship (GLO) |

References

1. Kwade, A.; Diekmann, J.; Hanisch, C.; Spengler, T.; Thies, C.; Herrmann, C.; Dröder, K.; Cerdas, F.; Gerbers, R.; Scholl, S.; Stehmann, F.; Haas, P.; Kurrat, M.; Hauck, D. *Recycling von Lithium-Ionen-Batterien—LithoRec II Abschlussberichte der beteiligten Verbundpartner*; Verbundprojekt im Rahmen des Förderprogramms, Erneuerbar Mobil “des Bundesministeriums für Umwelt, Naturschutz, Bau und Reaktorsicherheit; 2016. Available online: https://www.erneuerbar-mobil.de/sites/default/files/2017-01/Abschlussbericht_LithoRec_II_20170116.pdf (Accessed on 20 October 2017)
2. Hanisch, C.; Haselrieder, W.; Kwade, A. Recycling von Lithium-Ionen- Batterien—Das Projekt LithoRec. In *Recycling und Rohstoffe*; Thomé-Kozmienski, D.G.K.J., Ed.; TK Verlag: Neuruppin, Germany, 2012; pp. 691–698.
3. Hanisch C.; Loellhoeffel T.; Diekmann J.; Markley K. J.; Haselrieder W.; Kwade A. Recycling of lithium-ion batteries: A novel method to separate coating and foil of electrodes. *J. Clean. Prod.*, *108*, 2015, 301–311.
4. Hanisch, C.; Diekmann, J.; Stieger, A.; Haselrieder, W.; Kwade, A. Recycling of Lithium-Ion Batteries. In *Handbook of Clean Energy Systems*; John Wiley & Sons, Ltd: New York, NY, United States, 2015; 1–24.
5. Cerdas, F.; Andrew, S.; Thiede, S.; Herrmann, C. Disassembly Planning and Assessment of Automation Potentials for Lithium-Ion Batteries. In *Recycling of Lithium-Ion Batteries the Lithorec Way*; Springer: Cham, Switzerland, 2018; pp. 83–97.
6. Cerdas, F.; Andrew, S.; Thiede, S.; Herrmann, C. Environmental Aspects of the Recycling of Lithium-Ion Traction Batteries. In *Recycling of Lithium-Ion Batteries the Lithorec Way*; Springer: Cham, Switzerland, 2018; pp. 267–288.
7. Ellingsen, L.A.-W.; Majeau-Bettez, G.; Singh, B.; Srivastava, A.K.; Valøen, L.O.; Strømman, A.H. Life Cycle Assessment of a Lithium-Ion Battery Vehicle Pack. *J. Ind. Ecol.* **2014**, *18*, 113–124.
8. Majeau-Bettez, G.; Hawkins, T.R.; Strømman, A.H. Life Cycle Environmental Assessment of Li-iion and Nickel Metal Hydride Batteries for Plug-in Hybrid and Battery Electric Vehicles. Supporting Information. *Environ. Sci. Technol.* **2011**, *45*, 4548–4554.
